# Supplementary material
Source: Research Square preprint supplement (doi:10.21203/rs.3.rs-10299262/v1)
Supplement: Supplementary file 1 [file ed5a7535897b8e0f8e174a7f.docx]

**Supplementary Table 1. Japanese procedure codes used to identify patients who underwent colorectal endoscopic resection (CER)**

| **Category** | **Description** | **Japanese Procedure Codes** |
| --- | --- | --- |
| **Colorectal resection (CR)** | Endoscopic or surgical colorectal resection procedures | 190181510, 190181410, 190181310, 190181210, 150363910, 150348510, 150285010, 150183650, 150183410 |

**Supplementary Table 2. Japanese procedure codes used to define history of gastrointestinal endoscopic hemostasis and blood transfusion**

| **Category** | **Description** | **Japanese Procedure Codes** |
| --- | --- | --- |
| **Gastrointestinal endoscopic hemostasis** | History of endoscopic hemostasis | 150263950 |
| **Blood transfusion** | History of blood transfusion | 150224910, 150286310 |

**Supplementary Table 3. Specific Japanese drug codes (YJ codes) used to define SSRI use**

| **Category** | **Generic Name (Class)** | **YJ Codes (Japanese Drug Codes)** |
| --- | --- | --- |
| **SSRIs** | **Fluvoxamine** | 100000067670, 100000067532, 100000067672, 100000067548, 100000067540, 100000070868, 100000067671, 100000067543, 100000044286, 100000016312, 100000067544, 100000067561, 100000067577, 100000067546, 100000067570, 100000067554, 100000071827, 100000088473, 100000044287, 100000002006, 100000067575, 100000002005, 100000071843, 100000059203, 100000067576, 100000071835, 100000001995, 100000067552, 100000070867, 100000067551, 100000071256, 100000067556, 100000067553, 100000068339, 100000059936, 100000001994, 100000067569, 100000068341, 100000067568, 100000067537, 100000067557, 100000067536, 100000067555, 100000067549, 100000067676, 100000067675, 100000067531, 100000067533, 100000067535, 100000067567, 100000067539, 100000067578, 100000067541, 100000067562, 100000067559, 100000071844, 100000068340, 100000067547, 100000067545, 100000067674, 100000067560 |
|  | **Paroxetine** | 100000069792, 100000069764, 100000069833, 100000069793, 100000069763, 100000089833, 100000071240, 100000072095, 100000069837, 100000069798, 100000069807, 100000083702, 100000072438, 100000069811, 100000089832, 100000083901, 100000069852, 100000069800, 100000089834, 100000084656, 100000069810, 100000069799, 100000069808, 100000082730, 100000083904, 100000069853, 100000069839, 100000069816, 100000069746, 100000069841, 100000080650, 100000016249, 100000069747, 100000069840, 100000072434, 100000079686, 100000069796, 100000069795, 100000080648, 100000069769, 100000072687, 100000069757, 100000072561, 100000069855, 100000069854, 100000002267, 100000069759, 100000069772, 100000069776, 100000089153, 100000069819, 100000069760, 100000069847, 100000088253, 100000002268, 100000088251, 100000069752, 100000089726, 100000069754, 100000069775, 100000069758, 100000089724, 100000069750, 100000069826, 100000069751, 100000067071, 100000069766, 100000069804, 100000069829, 100000069832, 100000069802, 100000069767, 100000069828, 100000089725, 100000069755, 100000069778, 100000069790, 100000069786, 100000069768, 100000069825, 100000069785, 100000069803, 100000069771, 100000069779, 100000070878, 100000069770, 100000069817, 100000072096, 100000084655, 100000069756, 100000089157, 100000089155, 100000083900, 100000069818, 100000088252, 100000069806, 100000082816, 100000084657, 100000069850, 100000069851, 100000069762, 100000069777, 100000069830, 100000069821, 100000069788, 100000069824, 100000069789, 100000069848, 100000069835, 100000069836, 100000072437, 100000069822 |
|  | **Sertraline** | 100000079549, 100000080042, 100000080131, 100000080143, 100000080951, 100000080038, 100000082724, 100000080111, 100000080224, 100000079542, 100000080727, 100000080144, 100000079527, 100000079456, 100000082707, 100000084986, 100000079540, 100000053389, 100000053512, 100000077042, 100000079516, 100000084987, 100000053190, 100000053278, 100000079523, 100000079522, 100000079517, 100000079526, 100000079553, 100000079532, 100000079524, 100000079521, 100000079552, 100000079386, 100000079075, 100000079556, 100000079082, 100000079529, 100000079081, 100000079561, 100000079236, 100000080726, 100000079530, 100000089703, 100000080041, 100000076615, 100000079550, 100000079531, 100000089702, 100000079554, 100000075026, 100000079536, 100000076449, 100000079551, 100000079541, 100000079533, 100000079534, 100000079528, 100000079537, 100000079548, 100000079562, 100000079558, 100000076450, 100000079076, 100000079525, 100000080243, 100000079535, 100000089704, 100000080147, 100000080039, 100000080864, 100000079557, 100000079538 |
|  | **Escitalopram** | 100000089397, 100000089456, 100000089373, 100000089489, 100000089398, 100000089457, 100000089487, 100000068573, 100000089411, 100000089490, 100000089455, 100000068572, 100000089395, 100000084206, 100000089410, 100000089394, 100000089393, 100000089371, 100000089486, 100000089485, 100000089374, 100000089372, 100000089458, 100000089396, 100000089488 |

**Abbreviations:** SSRIs, selective serotonin reuptake inhibitors; YJ code, Japanese individual drug code.

**Supplementary Table 4. Japanese procedure codes used to define delayed bleeding (outcome)**

| **Category** | **Description** | **Japanese Procedure Codes** |
| --- | --- | --- |
| **Delayed bleeding (outcome)** | Endoscopic hemostasis | 150263950 |
|  | Blood transfusion | 150224910, 150286310 |

*Note: Delayed bleeding was defined as the first occurrence of either endoscopic hemostasis or blood transfusion after the index date.*

**Supplementary Table 5. Specific Japanese drug codes (YJ codes) used to define non-steroidal anti-inflammatory drugs (NSAIDs)**

| **Class** | **Generic Name** | **YJ Codes (Japanese Drug Codes)** |
| --- | --- | --- |
| **NSAIDs** | **Celecoxib** | 100000086782, 100000086831, 100000087726, 100000086828, 100000087765, 100000086829, 100000086834, 100000086873, 100000055083, 100000087081, 100000055084, 100000055069, 100000055070, 100000086824, 100000086839, 100000086757, 100000086874, 100000086758, 100000086715, 100000086755, 100000086803, 100000086827, 100000086756, 100000086754, 100000086759, 100000086840, 100000086717, 100000089894, 100000086823, 100000086837, 100000086714, 100000086832, 100000086841, 100000086835, 100000086822, 100000086719, 100000086833, 100000086842, 100000086716, 100000086836, 100000086825, 100000089893, 100000086826 |
|  | **Loxoprofen** | 100000081604, 100000016491, 100000084887, 100000019704, 100000085927, 100000019937, 100000084360, 100000019707, 100000071692, 100000073105, 100000073106, 100000060492, 100000025414, 100000081707, 100000081708, 10000001901, 100000070815, 100000083113, 100000074201, 100000072432, 100000084580, 100000072082, 100000076890, 100000054505, 100000069441, 100000083114, 100000072083, 100000059196, 100000059836, 100000071259, 100000064469, 100000081177, 100000078033, 100000074887, 100000070816, 100000072079, 100000070808, 100000059833, 100000070809, 100000087499, 100000064470, 100000078797, 100000022197, 100000073104, 100000081709, 100000078032, 100000085503, 100000083397 |
|  | **Meloxicam** | 100000060779, 100000060764, 100000060885, 100000060765, 100000060770, 100000060783, 100000068552, 100000061083, 100000060771, 100000060821, 100000060666, 100000060692, 100000060664, 100000060663, 100000060763, 100000060768, 100000060668, 100000068551, 100000060767, 100000060829, 100000049451, 100000049450, 100000060725, 100000061029, 100000060965, 100000060780, 100000060775, 100000060691, 100000060774, 100000060777, 100000060667, 100000060778, 100000060782, 100000060781, 100000060784, 100000060884, 100000060665, 100000060773, 100000060776, 100000060833, 100000060769, 100000060967, 100000060772, 100000049449, 100000049448, 100000049447 |
|  | **Ibuprofen** | 100000003138, 100000085925, 100000040234, 100000003256, 100000085924, 100000085719, 100000052641, 100000042638, 100000020191, 100000078431, 100000065161, 100000025402, 100000003135, 100000020192, 100000016264, 100000050105, 100000087854, 100000003194, 100000089773, 100000089652, 100000087880, 100000059193, 100000059522, 100000078026, 100000003139, 100000003136 |
|  | **Diclofenac** | 100000028800, 100000057815, 100000015049, 100000085708, 100000072904, 100000072905, 100000085267, 100000083802, 100000075679, 100000075678, 100000075146, 100000072906, 100000089699, 100000059827, 100000059829, 100000072078, 100000062350, 100000075300, 100000072431, 100000083713, 100000082251, 100000078507, 100000020220, 100000043146, 100000039958, 100000054387 |
|  | **Etodolac** | 100000072091, 100000040249, 100000086127, 100000008039, 100000059434, 100000052642, 100000065902, 100000081535, 100000067993, 100000075193, 100000081181, 100000067704, 100000059838, 100000072092, 100000067287, 100000081180, 100000002851, 100000075616, 100000065901, 100000075486 |
|  | **Zaltoprofen** | 100000041367, 100000043117, 100000041366, 100000076924, 100000076880, 100000081179, 100000050023, 100000072084, 100000073584, 100000082248, 100000020261 |
|  | **Indomethacin** | 100000039956, 100000003317, 100000003315, 100000029359, 100000003142, 100000003316, 100000016150, 100000015045, 100000014028, 100000014029 |
|  | **Piroxicam** | 100000076690, 100000076674, 100000017565, 100000016434 |
|  | **Other NSAIDs** * | 100000003168, 100000003177, 100000062040, 100000003240, 100000003326, 100000055171, 100000003183, 100000003184, 100000003285, 100000000248, 100000003230, 100000003261, 100000057544, 100000003217, 100000003154, 100000003147, 100000003288, 100000003318, 100000055533, 100000003327, 100000003257, 100000063401, 100000003325, 100000016194, 100000003178, 100000003247, 100000000087, 100000043980, 100000016318, 100000016285, 100000044410, 100000003246, 100000059524, 100000064703, 100000085926, 100000000579, 100000059832, 100000000437, 100000028782, 100000020222, 100000068830, 100000003279, 100000016007, 100000003289, 100000059197, 100000040209, 100000003146, 100000068483, 100000053373, 100000003149, 100000003278, 100000016173, 100000028778, 100000000043, 100000003238, 100000028500, 100000003216, 100000043978, 100000003133, 100000016202, 100000003322, 100000003180, 100000003222, 100000019091, 100000054354, 100000057547, 100000003219, 100000000041, 100000000063, 100000003243, 100000003291, 100000001754, 100000019061, 100000041373, 100000028807, 100000003144, 100000003157, 100000003284, 100000043982, 100000003274, 100000000049, 100000016157, 100000019367, 100000003290, 100000003188, 100000003276, 100000053776, 100000025406, 100000017512, 100000019299, 100000000007, 100000003160, 100000020207, 100000003275, 100000020262, 100000027832, 100000003283, 100000029729, 100000043442, 100000029743, 100000000058, 100000028736, 100000016167, 100000000042, 100000001437, 100000000048, 100000020249, 100000055374, 100000003239, 100000003232, 100000001910, 100000020108, 100000019366, 100000002299, 100000003208, 100000003320, 100000000249, 100000000578, 100000064058, 100000059826, 100000059823, 100000003169, 100000053186, 100000051745, 100000000267, 100000000253, 100000003332, 100000051744, 100000058329, 100000062251, 100000061879, 100000003170, 100000083939, 100000000252, 100000002713, 100000057549, 100000059191, 100000050065, 100000003185, 100000003331, 100000054504, 100000003153, 100000003234, 100000003258, 100000053446, 100000064266, 100000003212, 100000053187, 100000057804, 100000064583, 100000055532, 100000050064, 100000051708, 100000000250, 100000057595, 100000002144, 100000083934, 100000003334, 100000055172, 100000063790, 100000050274, 100000003262, 100000003241, 100000058373, 100000059831, 100000003270, 100000053372, 100000003207, 100000003287, 100000071698, 100000001830, 100000003277, 100000001901, 100000058193, 100000002298, 100000003280, 100000059828, 100000050273, 100000057550, 100000002938, 100000003333, 100000000141, 100000016874, 100000003191 |

**Abbreviations:** NSAIDs, non-steroidal anti-inflammatory drugs; YJ code, Japanese individual drug code.

**Note: "Other NSAIDs" includes minor classes and specific formulations such as pranoprofen, sulindac, mefenamic acid, tiaprofenic acid, nabumetone, flurbiprofen, and others included in the analysis.*

**Supplementary Table 6. Specific Japanese drug codes (YJ codes) used to define DOACs and warfarin**

| **Class** | **Generic Name** | **YJ Codes (Japanese Drug Codes)** |
| --- | --- | --- |
| **DOACs** | **Rivaroxaban** | 100000078958, 100000089304, 100000078957, 100000087728, 100000087790, 100000069607, 100000087709, 100000069608, 100000069609, 100000087708 |
|  | **Edoxaban** | 100000081977, 100000068556, 100000082063, 100000076138, 100000081965, 100000082064, 100000068554, 100000068555 |
|  | **Dabigatran** | 100000067932, 100000067930, 100000067931 |
|  | **Apixaban** | 100000071746, 100000071768, 100000071786 |
| **Vitamin K Antagonist** | **Warfarin** | 100000067785, 100000070638, 100000065626, 100000089500, 100000067786, 100000015187, 100000065834, 100000077853, 100000039686, 100000089499, 100000015188, 100000019156, 100000040013, 100000040014, 100000006205, 100000006206, 100000003002, 100000034794, 100000074682, 100000069459, 100000074683, 100000074684, 100000015186, 100000040012 |

**Abbreviations:** DOACs, direct oral anticoagulants; YJ code, Japanese individual drug code.

**Supplementary Table 7. Specific Japanese drug codes (YJ codes) used to define antiplatelet agents (aspirin and thienopyridines)**

| **Class** | **Generic Name** | **YJ Codes (Japanese Drug Codes)** |
| --- | --- | --- |
| **Aspirin** | **Aspirin** | 100000085190, 100000018884, 100000088355, 100000042000, 100000040256, 100000071579, 100000002275, 100000071068, 100000085329, 100000072454, 100000089057, 100000061189, 100000063057, 100000041523 |
|  | **Aspirin combinations** * | 100000075066 (Takeruda), 100000086297 (Cabpirin) |
| **Thienopyridines** | **Clopidogrel** | 100000078151, 100000084666, 100000078189, 100000078458, 100000079690, 100000078466, 100000078145, 100000078159, 100000078459, 100000078160, 100000078366, 100000078147, 100000078150, 100000078460, 100000078174, 100000078180, 100000078188, 100000089688, 100000089683, 100000078588, 100000078571, 100000052251, 100000083224, 100000078154, 100000078183, 100000078158, 100000078170, 100000078563, 100000079689, 100000078668, 100000078628, 100000078166, 100000052250, 100000078462, 100000078377, 100000078184, 100000078178, 100000078465, 100000078179, 100000084667, 100000078182, 100000078399, 100000078168, 100000052249, 100000078167, 100000089040, 100000078177, 100000078176, 100000078173, 100000078169, 100000078153, 100000078456, 100000078375, 100000078172, 100000078464, 100000078175, 100000089689, 100000083205, 100000078164, 100000078155, 100000078397, 100000078186, 100000078181, 100000078156, 100000089180, 100000078162, 100000078165, 100000078672, 100000052253, 100000078463, 100000078152, 100000078461, 100000078187 |
|  | **Clopidogrel combinations** ** | 100000073352 (Comprabin), 100000087711, 100000087713, 100000087712 (Loleas) |
|  | **Ticlopidine** | 100000071468, 100000072162, 100000006213, 100000059362, 100000018769, 100000071271, 100000076619, 100000060447, 100000072161, 100000001484, 100000051712, 100000064080, 100000041042, 100000086775, 100000006219, 100000072960, 100000024149, 100000078086, 100000070659, 100000063592, 100000072458, 100000078085, 100000072163 |
|  | **Prasugrel** | 100000079789, 100000083595, 100000075009, 100000074982, 100000075037, 100000078987 |
|  | **Ticagrelor** *** | 100000080501, 100000080533 |

**Abbreviations:** YJ code, Japanese individual drug code.

**Note: Aspirin combinations include fixed-dose combinations of aspirin with lansoprazole (Takeruda) or vonoprazan (Cabpirin).*

***Note: Clopidogrel combinations include fixed-dose combinations of clopidogrel with aspirin (Comprabin, Loleas). Code 100000073384 is also included in this category.*

****Note: Ticagrelor is technically a cyclopentyltriazolopyrimidine (CPTP) rather than a thienopyridine, but it functions as a P2Y12 inhibitor and is typically grouped with thienopyridines in clinical practice under the broad category of P2Y12 inhibitors or antiplatelet agents.*

**Supplementary Table 8. Japanese procedure codes used to define hemodialysis**

| **Category** | **Description** | **Japanese Procedure Codes** |
| --- | --- | --- |
| **Hemodialysis** | Hemodialysis procedures recorded within 7 days prior to the index date | 140036710, 140051010, 140051110, 140052810, 140057810, 140057910, 140058010, 140058110, 140058210, 140058310, 140058410, 140058510, 140058610, 140059310, 140059410, 140059510, 140060210, 140060310, 140060410, 140060510, 140060610, 140060710, 140060810, 140060910, 140061010 |

*Note: Hemodialysis was identified based on procedure codes recorded within 7 days prior to the index date, reflecting the clinical frequency of dialysis sessions (2–3 times per week).*

**Supplementary Table 9. ICD-10 codes used to define history of congestive heart failure (CHF)**

| **Category** | **Description** | **ICD-10 Codes (Japanese)** |
| --- | --- | --- |
| **Congestive heart failure (CHF)** | History of congestive heart failure based on ICD-10 codes | 3989002, 8840943, 8840942, 8833426, 8833422, 4029010, 8832678, 4148001, 4254028, 8846101, 8846192, 8833543, 4255001, 8840718, 8846092, 8846105, 8842533, 4254003, 4254008, 8836830, 4254011, 8835038 |

*Abbreviations: CR, colorectal resection; CHF, congestive heart failure; ICD-10, International Classification of Diseases, 10th Revision.*

**Supplementary Table 10. Sensitivity analyses.**

| **Scenario** | **Non-SSRI** | **SSRI** | **OR (95% CI)** | *p* value |
| --- | --- | --- | --- | --- |
| **Primary analysis (IPTW-adjusted)†** | **0.68%** | **0.73%** | **1.07 (0.68–1.69)** | **0.76** |
| Outcome restricted to 14-day post-procedural window‡ | 0.63%  (16.4/2,598) | 0.69%  (18.0/2,598) | 1.09 (0.69–1.75) | 0.71 |
| SSRI exposure defined as ≥3 consecutive prescriptions | 0.68%  (16.2/2,385) | 0.80%  (19.0/2,385) | 1.17 (0.74–1.85) | 0.50 |
| SSRI exposure defined as prescription within 30 days before procedure | 0.69%  (13.7/2,003) | 0.75%  (15.0/2,003) | 1.09 (0.66–1.82) | 0.73 |

**†** Primary analysis result (IPTW-adjusted) shown for reference.

‡ The OR for the 14-day outcome scenario (OR 1.09, 95% CI 0.69–1.75) was similar to the primary analysis (OR 1.07, 95% CI 0.68–1.69), as the vast majority of bleeding events occurred within 14 days of the procedure.

OR = odds ratio; CI = confidence interval; IPTW = inverse probability of treatment weighting; SSRI = selective serotonin reuptake inhibitor. The primary analysis did not reach statistical significance.
